# Supplementary material for: Hematopoietic effect of echinochrome on phenylhydrazine-induced hemolytic anemia in rats
Source: PeerJ. 2023 Dec 8;11:e16576. doi: 10.7717/peerj.16576 (PMC10712303; doi:10.7717/peerj.16576)
Supplement: Supplemental Information 1 [file peerj-11-16576-s001.xlsx]

## Sheet: Salma
	Total Protien	GGT	Albumin	GOT	GPT	ALP	Bilirubin	Urea	Uric	Creatinin
C1	4.92	1.11	3.1	13	14	12.35	0.50625	29.3522	6.92308	1.33333
C2	5.57	1.16	3.26	23		27.27	0.53325	27.6316	6.92308	1.66667
C3	5.22	2.03	3.74	13	11	21.82	0.51975	31.7814	7.84615	1.16667
C4	4.71	2.47	3.06	27	17	14.54	0.486	27.4291	7.61538	1.83333
C5	5.83	1.63	3.23	15	13	19.99	0.4725	27.9352	7.84615	1.83333
C6	3.5	1.59	3.17	16	15	21.82	0.486	27.834	7.69231	1.83333
M1	3.91	5.16	3	56	27	32.72	1.45755	40.3846	11.5385	2.36
M2	5.31	6.58	3.14	47	20	31.82	1.2177	42.915	12.4615	2.3
M3	4.1	3.32	3.19	36	25	36.36	1.1808	53.4008	18.4615	2.16667
M4	4.25	6.95	3.17	39	27	54.54	1.08855	48.664	13.3846	2.49667
M5	4.66	5.79	3.17	47	27	36.36	1.16235	43.6032	15.2308	2.26667
M6	5.48	3.32	3.17	56	26	36.36	1.16235	42.4089	14.3077	2.38333
T1	3.58	1.16	3.06	35	18	16.36	0.864	31.8016	9.23077	2
T2	3.95	1.1	3.12	25	20	33.58	0.81	38.1579	10.6154	1.66667
T3	5.55	1.16	3.14	27	16	29.75	0.8505	33.4211	9.23077	1.16667
T4	5.55	2.1	3.06	27	18	29.09	0.837	34.6154	8.30769	1.77
T5	5.61	2.32	2.97	26	18	28.18	0.837	34.7166	9.23077	1.82
T6	3.52	3.47	3.4	26	16	32.72	0.864	34.7166	12.9231	1.55
