# Supplementary material for: Hematopoietic effect of echinochrome on phenylhydrazine-induced hemolytic anemia in rats
Source: PeerJ. 2023 Dec 8;11:e16576. doi: 10.7717/peerj.16576 (PMC10712303; doi:10.7717/peerj.16576)
Supplement: Supplemental Information 2 [file peerj-11-16576-s002.xlsx]

## Sheet: Sheet1
Liver no.		weights	MDA	GSH	Catalase	NO	GST		Kidney no.		weights	MDA	GSH	Catalase	NO	GST
C1		1.0292	0.095	0.092	0.15	0.078	0		C1		0.1878	0.149	0.094	0.17	0.147	0.023
C2		1.093	0.116	0.173	0.181	0.102	0.538		C2		0.277	0.134	0.095	0.195	0.153	0.054
C3		1.0075	0.12	0.093	0.171	0.081	0.3		C3		0.2684	0.12	0.095	0.167	0.12	0.214
C4		1.2765	0.129	0.09	0.153	0.104	0.468		C4		0.2551	0.138	0.093	0.173	0.224	0.04
C5		1.2642	0.114	0.099	0.172	0.085	0.655		C5		0.3586	0.156	0.105	0.193	0.101	0.011
C6		1.4249	0.158	0.095	0.149	0.12	0.464		C6		0.3492	0.146	0.101	0.244	0.116	0.024
M1		0.9271	0.116	0.141	0.169	0.262	0.197		M1		0.2832	0.137	0.115	0.278	0.21	0.016
M2		0.9949	0.162	0.143	0.163	0.194	0.464		M2		0.3252	0.112	0.111	0.17	0.206	0.095
M3		1.2455	0.146	0.15	0.166	0.16	1.823		M3		0.3448	0.126	0.117	0.23	0.261	0.254
M4		1.6249	0.123	0.13	0.191	0.168	0.476		M4		0.3328	0.139	0.125	0.16	0.213	0.005
M5		1.5389	0.172	0.136	0.197	0.272	1.324		M5		0.412	0.112	0.133	0.203	0.155	0.384
M6		1.7017	0.17	0.175	0.219	0.506	0.565		M6		0.2947	0.14	0.118	0.152	0.188	0.033
T1		1.8593	0.125	0.194	0.216	0.498	0.413		T1		0.6284	0.161	0.113	0.186	0.232	0.041
T2		1.6381	0.128	0.204	0.156	0.451	0.255		T2		0.641	0.134	0.138	0.167	0.139	0.018
T3		1.4945	0.135	0.133	0.219	0.197	0.409		T3		0.5578	0.145	0.119	0.2	0.09	0.064
T4		1.733	0.116	0.136	0.188	0.268	1.212		T4		0.6061	0.14	0.141	0.178	0.206	0.095
T5		2.105	0.119	0.136	0.159	0.274	0.308		T5		0.5869	0.15	0.131	0.184	0.275	0.303
T6		2.4717	0.136	0.136	0.174	0.226	0.434		T6		0.6185	0.145	0.141	0.196	0.284	0.012
