# Supplementary material for: Hematopoietic effect of echinochrome on phenylhydrazine-induced hemolytic anemia in rats
Source: PeerJ. 2023 Dec 8;11:e16576. doi: 10.7717/peerj.16576 (PMC10712303; doi:10.7717/peerj.16576)
Supplement: Supplemental Information 3 [file peerj-11-16576-s003.xlsx]

## Sheet: Sheet1
3 DAYS
	WBC	LYM%	GRA%	RBC	HGB	HCT	MCV	MCH	MCHC	RDW_CV	RDW_SD	PLT	PCT	MPV	PDWs	P_LCR	P_LCC
C1	14	85.8	2	6.16	14.1	34.6	58.8	20.2	39.545	12.1	44.8	515	0.54	7.95	11.35	15.3	99
C2	11.7	86.3	2.1	6.32	14.7	32	56.7	24.5	37.785	13.2	44.8	525	0.41	8.26	12.85	13.6	120
C3	10.1	85.9	2.5	5.992	15.2	35.1	59.1	25.7	45.265	14.5	37	505	0.37	7.95	10.35	15.6	88
C4	12.3	85	2.3	5.84	14.1	36.6	55.7	22.15	40.205	13.8	38.9	589	0.5	8.32	11.85	12.7	97
C5	11.9	92.5	1	5.58	15.3	34	56	23.2	45.595	11.6	38.9	613	0.67	8.12	11.25	15.4	100
C6	12	87.1	1.98	5.9784	14.68	34.46	57.26	23.15	41.679	13.04	40.88	549.4	0.498	8.12	11.53	14.52	100.8
M1	42.1	91.9	2.8	3	13.7	19	72.9	46.4	28.765	24.9	68.9	635	0.64	8.5	13	19.5	148
M2	55.3	93.8	2.4	2.93	10.6	22.1	75.8	43.52	26.004	20.5	67	705	0.66	7.9	15.1	24.3	128
M3	48.1	95	2.6	2.77	9.3	20.2	79.2	46.38	27.06	21	70.9	804	0.66	9.2	15.5	24.4	179
M4	46.7	94.5	2.9	3.1	9.6	18.85	78.4	41.14	25.1075	24.6	62.9	816	0.67	9.13	16	19.2	156
M5	53.5	96.9	2.8	2.68	10.7	20.1	85.9	48.2	28.182	23.8	72.9	769	0.51	8.8	16.1	23.4	132
M6	52.3	89.5	2.1	2.44	9.6	19.1	80.14	46.5	26.51	20.19	62.9	745	0.54	8.5	15.1	21.9	142
T1	46.32	81.8	5.1	3.31	14.1	26.16	58.8	42.5	36.96	17.6	79.8	696	0.43	8.2	12.6	16.09	112
T2	47.39	71.5	5.2	3.3	14.8	29.1	57.9	40	42.68	16	50.8	593	0.36	8.1	13.9	15.02	129
T3	41.53	74.7	4.3	3.06	13.2	25.64	58.1	41.3	35.585	15.9	54.1	608	0.38	8.3	12.4	16.38	100
T4	47.61	72	4	3.52	13	23.9	62.6	41.9	36.795	16.8	57.6	513	0.4	8.2	13.9	13.62	110
T5	42.59	75.7	3.8	3.61	12.2	26.89	60.3	44.6	36.465	15.2	55.2	586	0.4	8.1	11.2	22.52	104
T6	46.12	78.8	4.7	3.22	13.4	27.62	54.7	41.5	41.745	16.9	57.6	640	0.58	8.9	14.6	13.17	120
6 DAYS
	WBC	LYM%	GRA%	RBC	HGB	HCT	MCV	MCH	MCHC	RDW_CV	RDW_SD	PLT	PCT	MPV	PDWs	P_LCR	P_LCC
C1	6.7	87.3	4.2	6.19	12.9	40.2	65.9	22.3	33.2	15.7	45.7	600	0.46	6.5	8.8	6.4	55.9
C2	6.4	86.4	3.2	6.86	14.3	38.3	67.3	21.5	36.3	16.3	43.8	568	0.36	6.8	8.9	6.4	56.5
C3	7	85.7	4.1	6.71	13.01	35.19	62.2	23.6	35.5	15.2	42.1	615	0.37	6.4	8.7	6.6	57.8
C4	6.8	86.3	3.6	6.69	14.5	34.84	60.18	21.4	35.6	14.23	45.7	589	0.39	6.6	8.7	5.9	66.2
C5	5.6	89.3	3.4	6.65	12.8	35.6	58.8	21.3	35.4	13.58	44.32	625	0.42	6.4	8.7	5.89	54
C6	7.2	80.3	4.2	5.85	13.17	34.23	57.7	20.8	35.3	14	40.2	635	0.44	6.5	8.8	6.5	55
M1	4.5	88.4	5.5	3.15	10.02	24	105.6	37.9	29.1	25.5	92	479	0.2	7.4	9.9	12	75
M2	4.6	93.2	6.4	3.22	11.01	25.5	90.7	35.7	28.2	23.5	96.1	416	0.36	7.7	9.5	10.5	84
M3	4.7	89	6.1	3.22	11.04	26.3	102.18	36.4	27.2	21.9	90.5	461	0.33	7.5	9.7	11.1	82
M4	4.3	92.7	6.1	2.71	9.4	28.2	105.3	35.7	26.6	22.4	98.8	434	0.33	7.7	10.4	13.9	84
M5	4.458	91.08	5.7	2.992	10.254	25.5	99.996	36.64	27.66	23.04	95.56	439.6	0.302	7.58	9.76	12.074	82.6
M6	4.19	92.1	4.4	2.66	9.8	23.5	96.2	37.5	27.2	21.9	100.4	408	0.29	7.6	9.3	12.87	88
T1	4.7	87.2	3.3	3.57	11.2	30.5	89.1	33.2	33.5	19.5	82.1	591	0.41	7	9.5	11.5	66
T2	6.9	87.2	2.8	3.95	11.6	31.9	98.2	32.8	33.4	18.9	76.5	496	0.4	7.2	9.2	11.4	65
T3	5.4	77.9	9.3	3.49	11.2	35.8	82.3	32.1	31.4	17.9	84.8	568	0.35	7	9.3	10.8	67
T4	6	74.2	10.1	3.77	11.7	33.7	89.2	31	34.7	16.8	78.9	436	0.39	6.7	9	9.2	70
T5	5.3	78.2	7.1	3.85	11.5	34.3	85.3	35.3	33.5	15.9	85.7	511	0.38	6.9	9.3	10	66
T6	5.8	81.5	6.8	3.66	11.5	33.8	82.3	31.6	34.2	18.4	79.1	480	0.34	7	9.3	10.9	60
