# Supplementary material for: Hematopoietic effect of echinochrome on phenylhydrazine-induced hemolytic anemia in rats
Source: PeerJ. 2023 Dec 8;11:e16576. doi: 10.7717/peerj.16576 (PMC10712303; doi:10.7717/peerj.16576)
Supplement: Supplemental Information 4 [file peerj-11-16576-s004.xls]

## Sheet: Sheet1
		df	F	p value
Proteins	Between Groups	2	0.308545	0.739066
	Within Groups	15
	Total	17
GGT	Between Groups	2	19.2981	7.11504e-05
	Within Groups	15
	Total	17
Albumin	Between Groups	2	1.12461	0.350681
	Within Groups	15
	Total	17
GOT	Between Groups	2	33.5778	2.89007e-06
	Within Groups	15
	Total	17
GPT	Between Groups	2	38.2142	2.13189e-06
	Within Groups	14
	Total	16
ALP	Between Groups	2	11.0885	0.00110565
	Within Groups	15
	Total	17
Bilirubin	Between Groups	2	130.282	3.30377e-10
	Within Groups	15
	Total	17
Urea	Between Groups	2	41.2063	8.05508e-07
	Within Groups	15
	Total	17
Uric	Between Groups	2	23.6716	2.28961e-05
	Within Groups	15
	Total	17
Creatinine	Between Groups	2	16.2989	0.000173296
	Within Groups	15
	Total	17
MDAL (L=liver))	Between Groups	2	16.4394	0.000165812
	Within Groups	15
	Total	17
MDAK (K=kidney)	Between Groups	2	132.027	3.00618e-10
	Within Groups	15
	Total	17
GSHL	Between Groups	2	17.8457	0.000108062
	Within Groups	15
	Total	17
GSHK	Between Groups	2	96.2842	2.76678e-09
	Within Groups	15
	Total	17
CATL	Between Groups	2	17.5728	0.000117201
	Within Groups	15
	Total	17
CATK	Between Groups	2	104.071	1.60812e-09
	Within Groups	15
	Total	17
NOL	Between Groups	2	7.47126	0.00560431
	Within Groups	15
	Total	17
NOK	Between Groups	2	32.1181	3.79103e-06
	Within Groups	15
	Total	17
GSTL	Between Groups	2	5.86096	0.0131576
	Within Groups	15
	Total	17
GSTK	Between Groups	2	1.5799	0.238425
	Within Groups	15
	Total	17
WBC3	Between Groups	2	234.671	4.80887e-12
	Within Groups	15
	Total	17
LYM3	Between Groups	2	49.0103	2.64241e-07
	Within Groups	15
	Total	17
GRA3	Between Groups	2	45.2748	4.41326e-07
	Within Groups	15
	Total	17
RBC3	Between Groups	2	315.977	5.4844e-13
	Within Groups	15
	Total	17
Hb3	Between Groups	2	21.2545	4.19434e-05
	Within Groups	15
	Total	17
HCT3	Between Groups	2	138.514	2.13799e-10
	Within Groups	15
	Total	17
MCV3	Between Groups	2	91.6418	3.89971e-09
	Within Groups	15
	Total	17
MCH3	Between Groups	2	206.204	1.22847e-11
	Within Groups	15
	Total	17
MCHC3	Between Groups	2	51.2134	1.98349e-07
	Within Groups	15
	Total	17
RDWCV3	Between Groups	2	63.0089	5.02495e-08
	Within Groups	15
	Total	17
RDWSD3	Between Groups	2	24.6438	1.81856e-05
	Within Groups	15
	Total	17
PLT3	Between Groups	2	18.1384	9.91474e-05
	Within Groups	15
	Total	17
PCT3	Between Groups	2	7.283	0.00616226
	Within Groups	15
	Total	17
MPV3	Between Groups	2	4.09966	0.0379858
	Within Groups	15
	Total	17
PDWs3	Between Groups	2	16.6891	0.000153395
	Within Groups	15
	Total	17
PLCR3	Between Groups	2	15.8556	0.000199541
	Within Groups	15
	Total	17
PLCC3	Between Groups	2	18.7793	8.23862e-05
	Within Groups	15
	Total	17
WBC6	Between Groups	2	23.0623	2.65497e-05
	Within Groups	15
	Total	17
LYM6	Between Groups	2	11.0391	0.00112797
	Within Groups	15
	Total	17
GRA6	Between Groups	2	3.75193	0.0477263
	Within Groups	15
	Total	17
RBC6	Between Groups	2	251.742	2.88516e-12
	Within Groups	15
	Total	17
Hb6	Between Groups	2	44.8874	4.66397e-07
	Within Groups	15
	Total	17
HCT6	Between Groups	2	48.2073	2.94183e-07
	Within Groups	15
	Total	17
MCV6	Between Groups	2	80.7036	9.37154e-09
	Within Groups	15
	Total	17
MCH6	Between Groups	2	257.044	2.47872e-12
	Within Groups	15
	Total	17
MCHC6	Between Groups	2	89.254	4.68212e-09
	Within Groups	15
	Total	17
PDWCV6	Between Groups	2	64.573	4.26249e-08
	Within Groups	15
	Total	17
PDWSD6	Between Groups	2	400.587	9.60089e-14
	Within Groups	15
	Total	17
PLT6	Between Groups	2	26.8967	1.09416e-05
	Within Groups	15
	Total	17
PCT6	Between Groups	2	9.66308	0.00201138
	Within Groups	15
	Total	17
MPV6	Between Groups	2	79.1059	1.07486e-08
	Within Groups	15
	Total	17
PDWS6	Between Groups	2	25.2671	1.57463e-05
	Within Groups	15
	Total	17
PLCR6	Between Groups	2	69.5436	2.58484e-08
	Within Groups	15
	Total	17
PLCC6	Between Groups	2	60.596	6.52452e-08
	Within Groups	15
	Total	17
